# Supplementary material
Source: Springer Nature journal article supplement (https://www.springermedizin.de/resource/supplementary/12933_2012_521_MOESM1_ESM.pdf/9538718)

# Myocardial collagen content

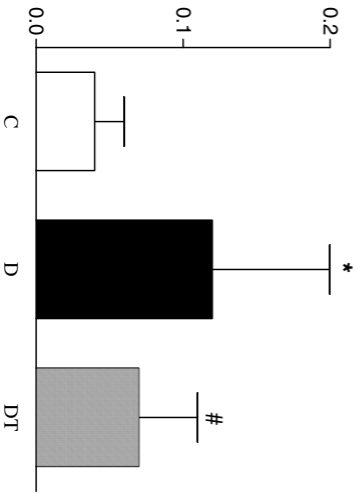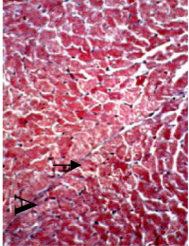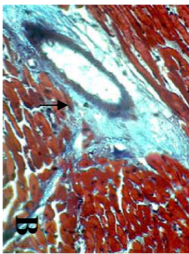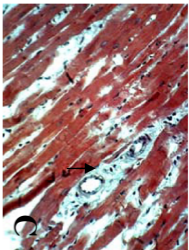

Supplement: MOESM1 [file 9538718]
